# Supplementary material
Source: PubMed Central journal article supplement (PMC3100973)
Supplement: 1013488108_pnas.201013488SI.pdf [file 1013488108_pnas.201013488SI.pdf]

# Supporting Information

Tourna et al. 10.1073/pnas.1013488108

## SI Materials and Methods

**Soil enrichments.** Five grams of grassland or garden soil (pH 8) were added as inoculum to 50 ml of medium for each of the 45 initial enrichment cultures. Variations included initial ammonium concentration (0.1, 0.2 and 0.5 mM), pH (6.4 and 7.5), incubation temperature (28 and 37°C) and supplements, i.e. autoclaved and filtered soil extract (10%), sand as a surface for cell attachment (10%), nitrite (0.1 mM) as a growth promoter, urea (0.5 mM) and streptomycin (50 µg/ml). Cultures were monitored for ammonium consumption and subcultured with 20% inoculum. The presence of bacterial ammonia oxidizers was checked with PCR using specific AOB primers targeting the *amoA* gene (1). Contamination with fungi in some of the cultures was overcome by filtering through a 0.45 µm filter. Enrichments EN76 and EN123 stemmed from garden soil, incubated at pH 7.5 with 0.5 mM ammonium. For these enrichments an incubation temperature of 37°C was used, and the media contained streptomycin and 0.1 mM nitrite.

**Cultivation of the pure culture.** Fresh water medium (FWM) consisted of NaCl (1 g l<sup>-1</sup>), MgCl<sub>2</sub> · 6H<sub>2</sub>O (0.4 g l<sup>-1</sup>), CaCl<sub>2</sub> · 2H<sub>2</sub>O (0.1 g l<sup>-1</sup>), KH<sub>2</sub>PO<sub>4</sub> (0.2 g l<sup>-1</sup>) and KCl (0.5 g l<sup>-1</sup>). After autoclaving 1 ml non-chelated trace element mixture (2), 1 ml Fe-NaEDTA solution and 2 ml sodium bicarbonate (1M) were added as previously described (2). The pH of the medium was 7.5 with addition of 10 ml l<sup>-1</sup> of HEPES buffer (1M HEPES, 0.6M NaOH). To determine the pH-optimum cultures were set up without HEPES and the pH was adjusted with 1M HCl or 1M KOH. Cultures were maintained routinely at 1 or 3 mM NH<sub>4</sub>Cl either in 100 ml or in 20 ml medium and were incubated aerobically at 37°C without shaking. Medium for the pure culture was additionally supplemented with 0.5 mM pyruvate if not stated otherwise. Growth was assessed by measurements of ammonium consumption using a salicylic acid assay (3), measurements of nitrite production by using the Griess reagent system (Promega), microscopy and quantitative PCR. Purification trials included serial dilutions and passage of the cultures through different antibiotics (streptomycin, carbenicillin, ampicillin, kanamycin and tetracycline). For all experiments described cultures were grown in duplicate or triplicate in 100 or 20 ml medium.

**Microscopy.** Cell counting was done using phase contrast light microscopy (after concentrating the cells where necessary). For scanning electron microscopy cells were grown on poly-L-lysine coated glass slides inserted in the cultures during the exponential growth phase for 2 d. Cells were fixed for 1 h in 2.5% glutaraldehyde solution, washed (0.1M sodium cacodylate, pH 7.2, 2% sucrose) and post fixed with 1% OsO<sub>4</sub>. Cells were dehydrated using an ethanol series (30%-100%) with a final dehydration step in acetone (100%), then critical point dried in liquid carbon dioxide. Slides were placed on conductive stubs and coated with gold (sputter coater, Agar), before analysis in a Philips XL30 scanning electron microscope (FEI) at 30keV. Images were processed with the Scandium Software (Olympus). For transmission electron microscopy cells were centrifuged and after fixation for 1h in 2.5% glutaraldehyde they were transferred on 200-mesh carbon/formvar-coated copper grids. Staining of cells was performed with 0.5% uranyl acetate for 2 min. A Philips EM 208 transmission electron microscope (FEI) operated at 70 keV and an attached megaview III camera (SIS) were used to record the micrographs.

**Cloning/sequencing/phylogenetic analysis.** PCR products of 16S rRNA and *amoA* and *amoB* genes were generated using the primer pairs A21F (4) and A1492R (5), CrenamoA-23F/CrenamoA-616R (6) and CrenAmo2.1F/CrenAmo2.1R (2), respectively. Cloning into pCR4-TOPO vector and sequencing with M13f and M13r vector primers was performed using standard procedures. A draft genome sequence of the enrichment EN76 was obtained by 454 pyrosequencing on a 454/FLX-Titanium sequencer (Roche) using 10 µg of input DNA which yielded 228,649 reads of an average length of 381 bp. Phylogenetic analysis of 16S rRNA gene sequences (1272 positions) and concatenated *amoA* and *amoB* protein sequences (365 positions) was performed using maximum-likelihood analysis calculated in PHYML (7) using the HKY85 with four-categories model of evolution and the LG model with eight categories, respectively. Bootstrap support was calculated 100 times for both analyses.

**Quantitative PCR.** Nucleic acid extraction from at least 1 ml culture was done as previously described (8). Quantification of archaeal *amoA* genes and bacterial 16S rRNA genes was performed in 20 µl volume containing 10 µl iQ<sup>TM</sup> SYBR Green Supermix (Bio-Rad), 1 µM of each primer and 0.2 mg ml<sup>-1</sup> BSA. For archaeal standards a serial dilution of the linearized soil fosmid clone 54d9 was used and *amoA* gene copies were quantified using the primers 104F (5'-GCAGGAGACTACATMTTCTA-3') and 616R (6) with an efficiency of 87%. For bacterial standards a serial dilution of the linearized plasmid (pCR4-TOPO, Invitrogen) containing the 16S rRNA gene of *Nitrosomonas europaea* was used and gene copies were quantified using the primers 338F and 518R (9) with an efficiency of 93%. Amplifications were performed in realplex (Mastercycler ep realplex, Eppendorf). Melting curve analysis was performed at the end of all qPCR runs to indicate amplification of specific products only, before confirmation by standard agarose gel electrophoresis. All qPCR data presented were from independent extractions from duplicate or triplicate cultures and duplicate independent PCR amplifications.

**Isotope labeling studies.** EN76 cultures were grown at 37 °C in 120 ml serum bottles in 50 ml medium containing 1 mM ammonium and 2 mM sodium bicarbonate, supplemented with either 0.5 mM fully labeled <sup>13</sup>C-pyruvate or 0.5 mM <sup>12</sup>C-pyruvate, respectively. Gas samples of the cultures at time point 0 h and 10 h were transferred to pre-evacuated glass vials and the stable carbon isotope ratios were analyzed in triplicate by continuous-flow isotope-ratio mass spectrometry on a Thermo Finnigan Delta V Advantage Mass Spectrometer (Thermo Fisher Scientific, Waltham, MA, USA) coupled to a Finnigan Gas Bench.

For NanoSIMS analyses, cells from 4 ml of a stationary culture were harvested, washed several times in PBS, fixed with 3 % paraformaldehyde (in 1x PBS) for 1h at room temperature, transferred on boron-doped silicon wafer platelets (7 × 7 × 0.5 mm), rinsed with highly purified water, and stored in a vacuum drying cabinet at 46°C overnight. SIMS measurements from triplicate grown cultures were performed on a NanoSIMS 50L instrument from Cameca (France). See supplementary information for more details.

**NanoSIMS analyses.** Prior to image acquisition, the analysis areas were pre-sputtered by scanning an unfocused, high intensity Cs<sup>+</sup> primary ion beam (~150 pA beam current) over an area of





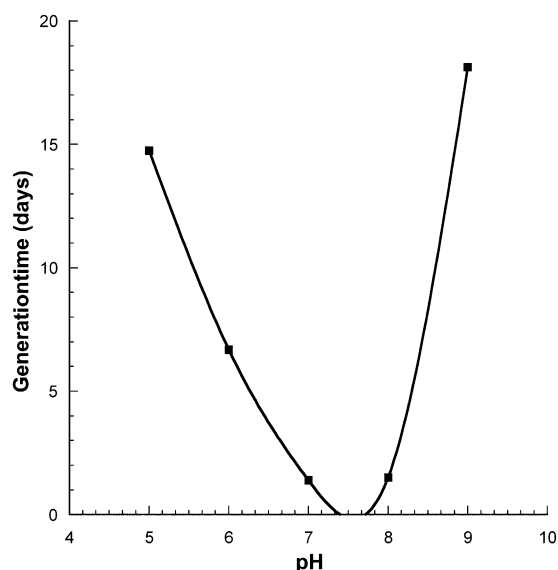

**Fig. S4.** Estimation of pH optimum of strain EN76. Triplicate cultures of strain EN 76 were grown in inorganic medium containing 1 mM ammonia and 0.5 mM pyruvate and under different pH (pH 5, 6, 7, 8, and 9) adjusted with either 1M HCl or 1M KOH and controlled and readjusted during growth, if necessary. Generation time was estimated as described in Fig. 1.

**Table S1.** Growth of strain EN76 with a range of substrates

| Substrate                                         | Growth score | Lag phase    | Final cell density after 35 d        |
|---------------------------------------------------|--------------|--------------|--------------------------------------|
| 3 mM ammonia                                      | +            | Long (>25 d) | Low ( $1 \times 10^7$ cells/mL)      |
| 1 mM ammonia                                      | +            | Long (>25 d) | Very low ( $5 \times 10^5$ cells/mL) |
| 1 mM ammonia + vitamins                           | -/+          | —            | —                                    |
| 3 mM ammonia + vitamins                           | +            | Long (>25 d) | Very low                             |
| 3 mM urea                                         | -/+          | —            | —                                    |
| 1 mM urea                                         | +            | Long (>25 d) | Low                                  |
| 0.5 mM urea                                       | +            | Long (>25 d) | Low                                  |
| 1 mM ammonia + 5 mM bicarbonate                   | -/+          | —            | —                                    |
| 1 mM ammonia + 10 mM bicarbonate                  | —            | —            | —                                    |
| 1 mM ammonia + 0.05% peptone                      | —            | —            | —                                    |
| 0.05% peptone + vitamins                          | —            | —            | —                                    |
| 1 mM ammonia + 0.05% yeast extract                | —            | —            | —                                    |
| 0.05% yeast extract + vitamins                    | —            | —            | —                                    |
| 1 mM ammonia + amino acid mix                     | —            | —            | —                                    |
| 1 mM amino acid mix + vitamins                    | —            | —            | —                                    |
| 1 mM ammonia + 1 mM glucose                       | +            | Long (>25 d) | Very low                             |
| 1 mM ammonia + 1 mM lactose                       | +            | Long (>25 d) | Very low                             |
| 1 mM ammonia + 1 mM arabinose                     | +            | Long (>25 d) | Very low                             |
| 1 mM ammonia + 1 mM malate                        | +            | Long (>25 d) | Low                                  |
| 1 mM ammonia + 1 mM sucrose                       | +            | Long (>25 d) | Very low                             |
| 1 mM ammonia + 1 mM galactose                     | +            | Long (>25 d) | Very low                             |
| 1 mM ammonia + 1 mM acetate                       | +            | Long (>25 d) | Very low                             |
| 1 mM ammonia + 0.5 mM acetate                     | +            | Long (>25 d) | Very low                             |
| 1 mM ammonia + 0.25 mM acetate                    | +            | Long (>25 d) | Very low                             |
| 1 mM ammonia + 1 mM pyruvate                      | ++           | Short (5 d)  | High ( $4.5 \times 10^7$ cells/mL)   |
| 1 mM ammonia + 0.5 mM pyruvate                    | ++           | Short (5 d)  | High                                 |
| 1 mM ammonia + 0.25 mM pyruvate                   | ++           | Short (5 d)  | High                                 |
| 0.5 mM urea + 0.5 mM pyruvate                     | ++           | Short (5 d)  | High                                 |
| 1 mM ammonia + 0.5 mM pyruvate + 0.025% acetylene | —            | —            | —                                    |
| 1 mM pyruvate + vitamins                          | -/+          | —            | —                                    |
| 1 mM trimethylamine                               | -/+          | —            | —                                    |
| 1 mM ethanolamine                                 | -/+          | —            | —                                    |
| 1 mM methanolamine                                | —            | —            | —                                    |

Growth of strain EN76 in inorganic medium containing 2 mM sodium bicarbonate (unless otherwise stated) and supplemented with a range of substrates. Evaluation of growth was estimated by regular ammonia consumption and nitrite production measurements as well as by cell counts after 35 days of incubation. Key to growth score: —, no growth; -/+, low nitrite formation ( $<250\mu\text{M}$ ), single cells visible; +, increased nitrite formation ( $250\text{--}600\mu\text{M}$ ), low cell density; ++, all ammonia converted to nitrite, high cell density. All incubations were done in duplicate.
